**Corrigendum: Journal of Water and Climate Change (2022) 13 (7): 2577–2596: Hydrologic characterization of the Upper Ayeyarwaddy River Basin and the impact of climate change, Pabitra Gurung, Shashwat Dhungana, Aung Kyaw Kyaw, Luna Bharati, <https://doi.org/10.2166/wcc.2022.407>**

The authors regret that the second affiliation for Luna Bharati was incorrect in their original paper and apologise for any inconvenience caused. The correct affiliation can be seen below and has been corrected online.

International Centre for Water Resources and Global Change (ICWRGC), Federal Institute of Hydrology, Koblenz, Germany
